# Supplementary material
Source: PubMed Central journal article supplement (PMC5746991)
Supplement: EHF2-3-122-s002.pdf [file EHF2-3-122-s002.pdf]

**Supplemental Figure 1:**

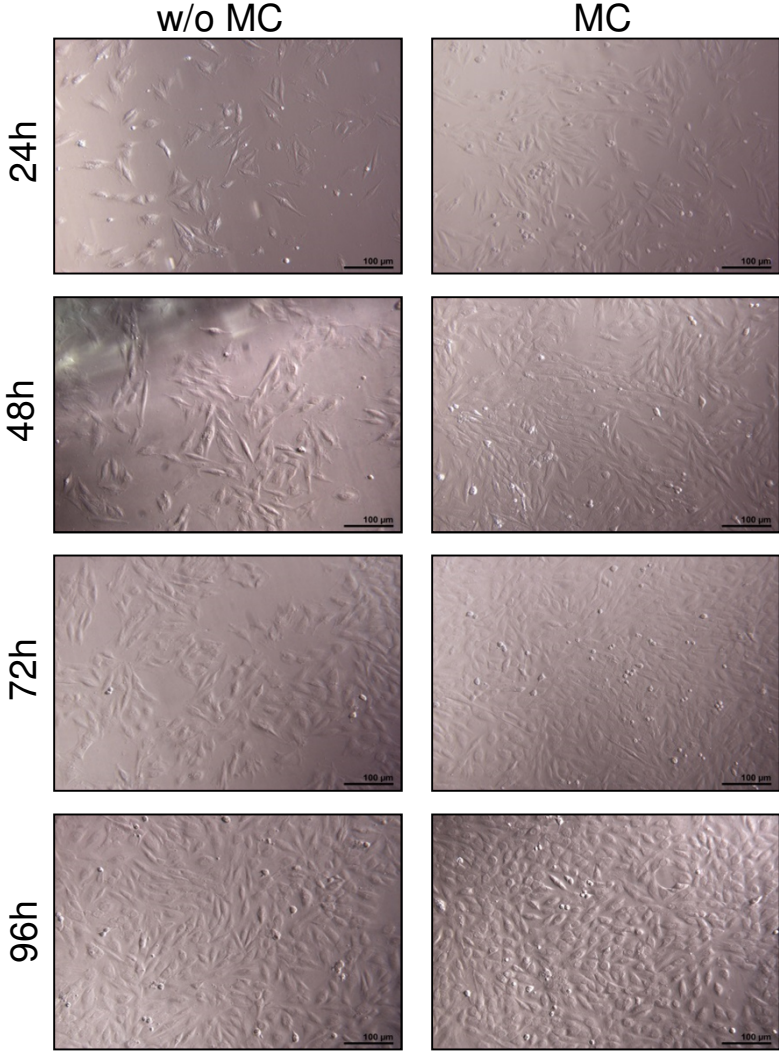

**Supplemental Figure 1:**  
Phase contrast images (100x magnification) of cardiomyocytes from young SHR treated without and with MC for up to 96h. All cells were adherent within 24h after seeding. No morphological changes during the indicated time period were observed.
